# Supplementary material for: Synthesis and organization of nanoscale II–VI semiconductor materials using evolved peptide specificity and viral capsid assembly
Source: Royal Society of Chemistry journal article supplement (doi:10.1039/b307593a), 2003-01-01
Supplement: b307593a.pdf [file b307593a.pdf]

Observed amino acid group frequency (%) by position

**ROUND 3**

| Amino AcidGroup | pos 1 | pos 2 | pos 3 | pos 4 | pos 5 | pos 6 | pos 7 |
|-----------------|-------|-------|-------|-------|-------|-------|-------|
| (+) Charges     | 26    | 26    | 11    | 6     | 23    | 6     | 20    |
| (-) Charges     | 3     | 3     | 6     | 0     | 9     | 3     | 3     |
| Phobics         | 20    | 29    | 23    | 29    | 17    | 21    | 14    |
| -OH             | 37    | 14    | 29    | 14    | 23    | 38    | 26    |
| Met             | 6     | 3     | 3     | 6     | 0     | 6     | 3     |
| Trp, Phe        | 3     | 0     | 0     | 11    | 9     | 0     | 3     |
| Pro             | 3     | 14    | 1     | 11    | 14    | 21    | 11    |
| Asn, Gln        | 3     | 11    | 11    | 23    | 6     | 6     | 20    |

**ROUND 4**

| Amino AcidGroup | pos 1 | pos 2 | pos 3 | pos 4 | pos 5 | pos 6 | pos 7 |
|-----------------|-------|-------|-------|-------|-------|-------|-------|
| (+) Charges     | 10    | 41    | 29    | 24    | 5     | 27    | 9     |
| (-) Charges     | 0     | 0     | 0     | 0     | 0     | 0     | 5     |
| Phobics         | 38    | 9     | 29    | 48    | 32    | 36    | 14    |
| -OH             | 19    | 9     | 14    | 0     | 18    | 23    | 9     |
| Met             | 0     | 5     | 10    | 10    | 9     | 0     | 0     |
| Trp, Phe        | 0     | 0     | 0     | 0     | 5     | 0     | 5     |
| Pro             | 10    | 9     | 10    | 10    | 5     | 14    | 23    |
| Asn, Gln        | 24    | 27    | 10    | 10    | 27    | 0     | 36    |

**ROUND 5**

| Amino AcidGroup | pos 1 | pos 2 | pos 3 | pos 4 | pos 5 | pos 6 | pos 7 |
|-----------------|-------|-------|-------|-------|-------|-------|-------|
| (+) Charges     | 15    | 27    | 48    | 4     | 4     | 4     | 7     |
| (-) Charges     | 0     | 0     | 0     | 0     | 0     | 4     | 0     |
| Phobics         | 26    | 4     | 26    | 7     | 30    | 7     | 15    |
| -OH             | 19    | 4     | 11    | 11    | 11    | 19    | 22    |
| Met             | 4     | 0     | 4     | 37    | 7     | 4     | 0     |
| Trp, Phe        | 4     | 4     | 0     | 4     | 4     | 0     | 0     |
| Pro             | 0     | 4     | 0     | 19    | 37    | 11    | 4     |
| Asn, Gln        | 33    | 58    | 11    | 19    | 7     | 52    | 52    |
